# Supplementary material for: Individual Coal Mine Methane Emissions Constrained by Eddy-Covariance Measurements: Low Bias and Missing Sources
Source: Copernicus journal article supplement (doi:10.5194/egusphere-2023-1210), 2023-07-06
Supplement: Supplementary file 1 [file egusphere-2023-1210-supplement.pdf]

**Table S1: Emission Factors used in this study**

| <b>Category</b>    |                      | <b>CH<sub>4</sub> Emission Factors / (m<sup>3</sup> t<sup>-1</sup>)</b> |                     |                                          |                                        |                                         |
|--------------------|----------------------|-------------------------------------------------------------------------|---------------------|------------------------------------------|----------------------------------------|-----------------------------------------|
|                    | <b>Low</b>           | 3.34                                                                    | 0.739               | 4.53                                     | 2.94                                   | 3.42                                    |
| <b>Underground</b> | <b>High</b>          | 22.1                                                                    | 11.4                | 21.8                                     | 26.2                                   | 22.7                                    |
|                    | <b>Outburst</b>      | 22.1                                                                    | 41.0                | 21.8                                     | 26.2                                   | 46.4                                    |
| <b>Surface</b>     |                      | 2.5                                                                     |                     | 2.5                                      | 2.5                                    | 2.5                                     |
| <b>Default</b>     |                      | 12.7                                                                    | 5.80                | 12.7                                     | 14.7                                   | 12.7                                    |
| <b>Abandoned</b>   | <b>Surface/Low</b>   | 0.5                                                                     |                     | 0.5                                      | 0.5                                    | 0.5                                     |
|                    | <b>High/Outburst</b> | 3                                                                       |                     | 3                                        | 3                                      | 3                                       |
| <b>Reference</b>   |                      | (Zheng et al., 2005; Sheng et al., 2019)                                | (Wang et al., 2013) | (Zheng et al., 2005; Huang et al., 2019) | (Zheng et al., 2005; Gao et al., 2021) | (Zheng et al., 2005; Wang et al., 2019) |

**Table S2: Statistic information of constrained CMM flux in  $\text{ug m}^2 \text{s}^{-1}$ . For all data, we only show 3 valid digits.**

|                    |    | <b>Low</b>     | <b>Low Rank</b> | <b>Low Rank</b> | <b>High Rank</b> | <b>High Rank</b> | <b>High</b>    |  |  |
|--------------------|----|----------------|-----------------|-----------------|------------------|------------------|----------------|--|--|
|                    |    | <b>Rank Q1</b> | <b>Q2</b>       | <b>Q3</b>       | <b>Q1</b>        | <b>Q2</b>        | <b>Rank Q3</b> |  |  |
| <b>Percentiles</b> | 10 | 0.12           | 0.27            | 0.31            | 1.75             | 1.75             | 1.62           |  |  |
|                    | 20 | 0.26           | 0.60            | 0.69            | 4.23             | 4.23             | 3.94           |  |  |
|                    | 30 | 0.55           | 1.29            | 1.48            | 9.13             | 9.13             | 8.90           |  |  |
|                    | 40 | 0.95           | 2.22            | 2.54            | 16.5             | 16.5             | 16.1           |  |  |
|                    | 50 | 1.66           | 3.88            | 4.44            | 27.0             | 27.0             | 26.2           |  |  |
|                    | 60 | 2.76           | 6.48            | 7.40            | 46.7             | 46.7             | 46.7           |  |  |
|                    | 70 | 4.87           | 11.4            | 13.0            | 78.8             | 78.8             | 77.2           |  |  |
|                    | 80 | 10.1           | 23.7            | 27.1            | 188              | 188              | 174            |  |  |
|                    | 90 | 21.3           | 50.0            | 57.2            | 333              | 333              | 333            |  |  |

  

|                    |    | <b>Outburst</b> | <b>Outburst</b> | <b>Outburst</b> | <b>Default</b> | <b>Default</b> | <b>Default</b> | <b>Flux</b>   | <b>Flux</b>   |
|--------------------|----|-----------------|-----------------|-----------------|----------------|----------------|----------------|---------------|---------------|
|                    |    | <b>Rank Q1</b>  | <b>Rank Q2</b>  | <b>Rank Q3</b>  | <b>Rank</b>    | <b>Rank</b>    | <b>Rank</b>    | <b>2021</b>   | <b>2022</b>   |
|                    |    |                 |                 |                 | <b>Q1</b>      | <b>Q2</b>      | <b>Q3</b>      | <b>Winter</b> | <b>Summer</b> |
| <b>Percentiles</b> | 10 | 3.06            | 1.60            | 2.84            | 0.85           | 0.97           | 0.95           | 0.83          | 0.78          |
|                    | 20 | 5.89            | 3.09            | 5.47            | 2.62           | 2.97           | 2.90           | 1.97          | 2.70          |
|                    | 30 | 15.6            | 8.18            | 14.5            | 4.35           | 4.94           | 4.83           | 3.66          | 5.77          |
|                    | 40 | 30.0            | 15.7            | 27.9            | 8.19           | 9.30           | 9.08           | 6.05          | 9.99          |
|                    | 50 | 44.2            | 23.1            | 41.0            | 12.7           | 14.4           | 14.0           | 10.3          | 18.3          |
|                    | 60 | 85.0            | 44.5            | 78.9            | 23.1           | 26.2           | 25.6           | 16.0          | 29.0          |
|                    | 70 | 125             | 65.3            | 116             | 35.8           | 40.6           | 39.7           | 27.4          | 57.6          |
|                    | 80 | 240             | 126             | 223             | 95.1           | 108            | 105            | 50.2          | 89.3          |
|                    | 90 | 567             | 297             | 527             | 158            | 180            | 175            | 140           | 161           |

**Table S3: detail in EPWP and GPWP.**

|                                                | EDGAR-R1 |      | EDGAR-R3 |      | EDGAR-R5 |      | EDGAR-R7 |      | EDGAR-R9 |      |
|------------------------------------------------|----------|------|----------|------|----------|------|----------|------|----------|------|
|                                                | +        | -    | +        | -    | +        | -    | +        | -    | +        | -    |
| <b>Grid_Number</b>                             | 194      | 7    | 161      | 40   | 95       | 106  | 42       | 159  | 12       | 189  |
| <b>Total_Emissions<br/>(Gg d<sup>-1</sup>)</b> | 14.3     | 0.01 | 12.0     | 0.40 | 9.04     | 3.61 | 6.56     | 18.4 | 3.36     | 110. |
|                                                | GFEI-R1  |      | GFEI-R3  |      | GFEI-R5  |      | GFEI-R7  |      | GFEI-R9  |      |
|                                                | +        | -    | +        | -    | +        | -    | +        | -    | +        | -    |
| <b>Grid_Number</b>                             | 169      | 58   | 108      | 119  | 53       | 174  | 30       | 197  | 10       | 217  |
| <b>Total_Emissions<br/>(Gg d<sup>-1</sup>)</b> | 7.40     | 0.13 | 5.76     | 1.45 | 4.03     | 6.43 | 2.49     | 23.8 | 1.09     | 126. |

**References**

- Gao, J., Guan, C., Zhang, B., and Li, K.: Decreasing methane emissions from China's coal mining with rebounded coal production, *Environ Res Lett*, 16, 124037, <https://doi.org/10.1088/1748-9326/ac38d8>, 2021.
- Huang, M., Wang, T., Zhao, X., Xie, X., and Wang, D.: Estimation of atmospheric methane emissions and its spatial distribution in China during 2015, *Huanjing Kexue Xuebao/Acta Scientiae Circumstantiae*, 39, 1371-1380, 2019.
- Sheng, J., Song, S., Zhang, Y., Prinn, R. G., and Janssens-Maenhout, G.: Bottom-Up Estimates of Coal Mine Methane Emissions in China: A Gridded Inventory, Emission Factors, and Trends, *Environ Sci Tech Lett*, 6, 473-478, <https://doi.org/10.1021/acs.estlett.9b00294>, 2019.
- Wang, K., Zhang, J., Cai, B., and Yu, S.: Emission factors of fugitive methane from underground coal mines in China: Estimation and uncertainty, *Appl Energ*, 250, 273-282, <https://doi.org/10.1016/j.apenergy.2019.05.024>, 2019.
- Wang, N., Zhu, T., Chen, S., and Luo, D. W.: Study on the Interprovincial Emission Factor of Chinese Coal Mine Methane, *Appl Mech Mater*, 295-298, 3354-3358, <https://doi.org/10.4028/www.scientific.net/AMM.295-298.3354>, 2013.
- Zheng, S., Wang, Y., and Wang, Z.: Methane emissions to atmosphere from coal mine in China, *Safety in Coal Mines*, 36, 29-33, 2005.
